# Supplementary material for: Dissecting the steps of CO2reduction: 1. The interaction of CO and CO2with γ-Al2O3: an in situ FTIR study
Source: Royal Society of Chemistry journal article supplement (doi:10.1039/c4cp00616j), 2014-01-01
Supplement: c4cp00616j1.pdf [file c4cp00616j1.pdf]

## Dissecting the steps of CO<sub>2</sub> reduction: 1. The interaction of CO and CO<sub>2</sub> with $\gamma$ -Al<sub>2</sub>O<sub>3</sub>: *an in situ FTIR study*

János Szanyi\*, Ja Hun Kwak<sup>#</sup>

Institute for Integrated Catalysis, Pacific Northwest National Laboratory

Richland, WA 99352

E-mail: [janos.szanyi@pnnl.gov](mailto:janos.szanyi@pnnl.gov)

<sup>#</sup>Current address: Department of Chemical Engineering, UNIST

100 Banyeon-Ri, Ulsan 689-798, Korea

### Supplementary Information:

**Figure S1:** IR spectra collected at 295 K during stepwise CO<sub>2</sub> adsorption on  $\gamma$ -Al<sub>2</sub>O<sub>3</sub> samples calcined at 473 (a), 573 (b), 673 (c) and 773 K (d).

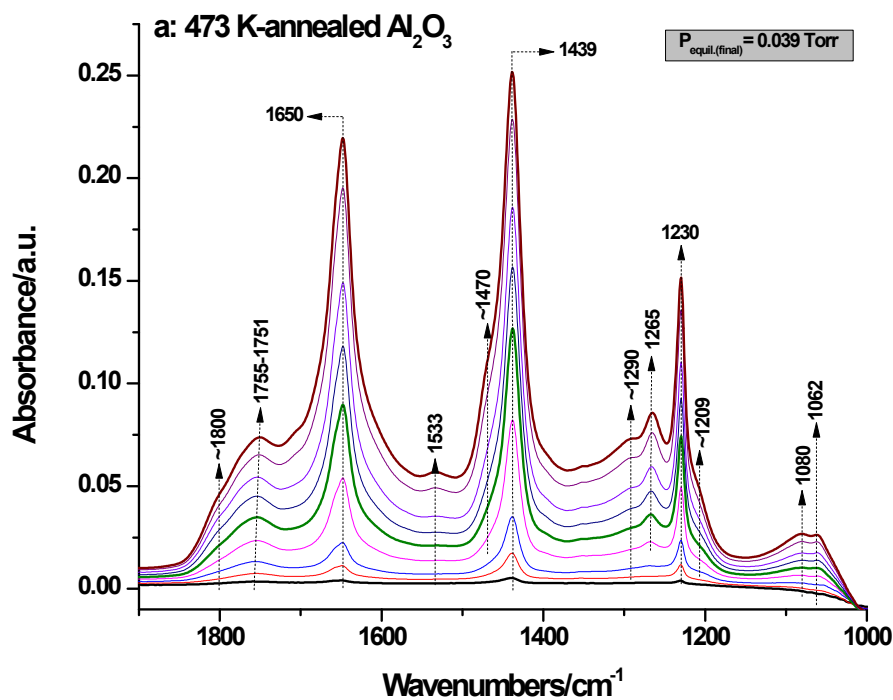

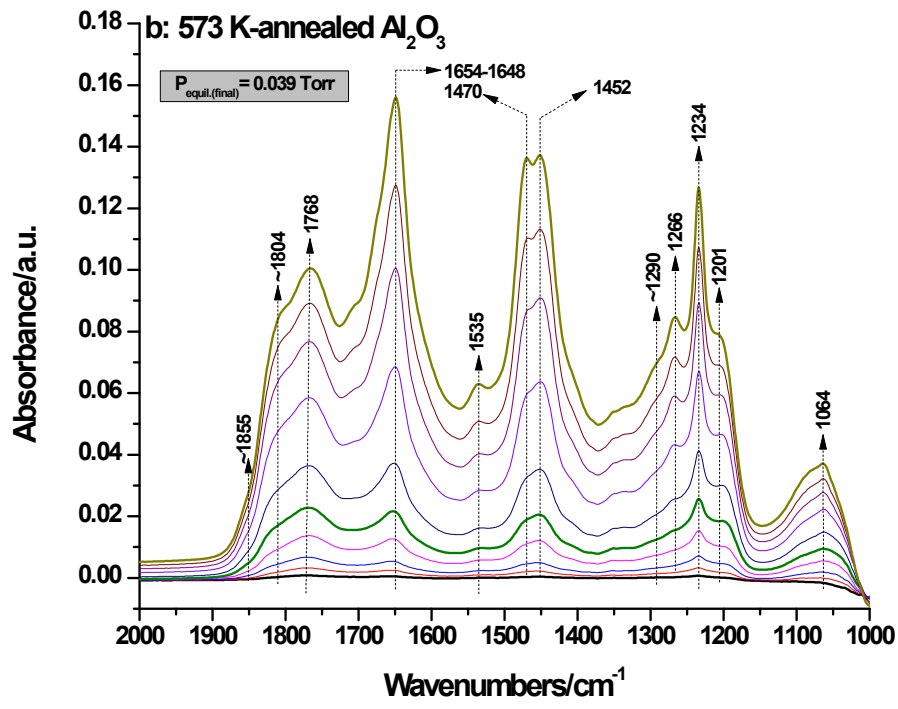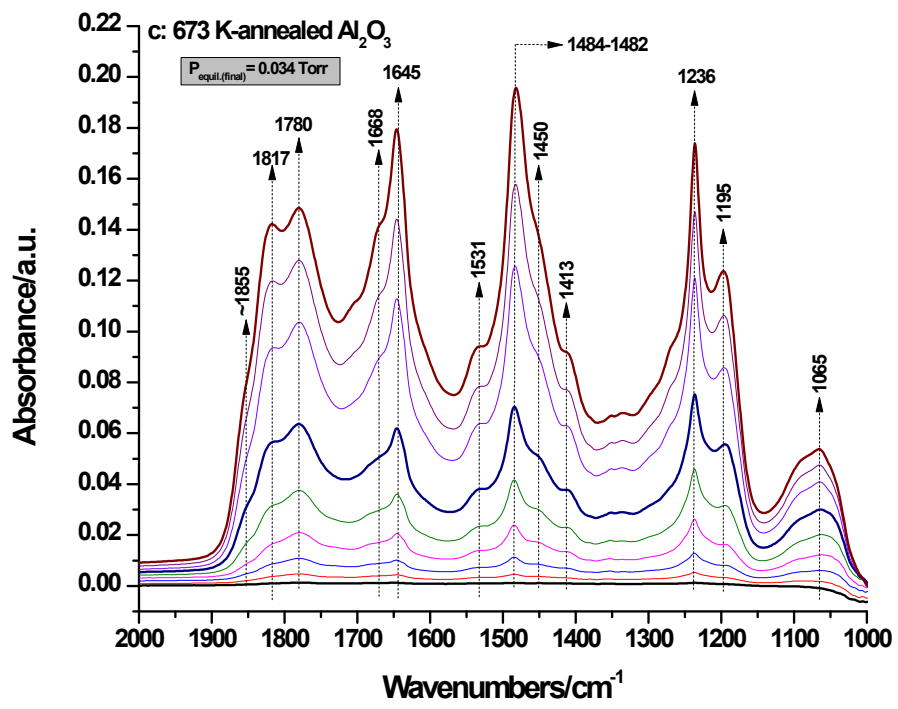

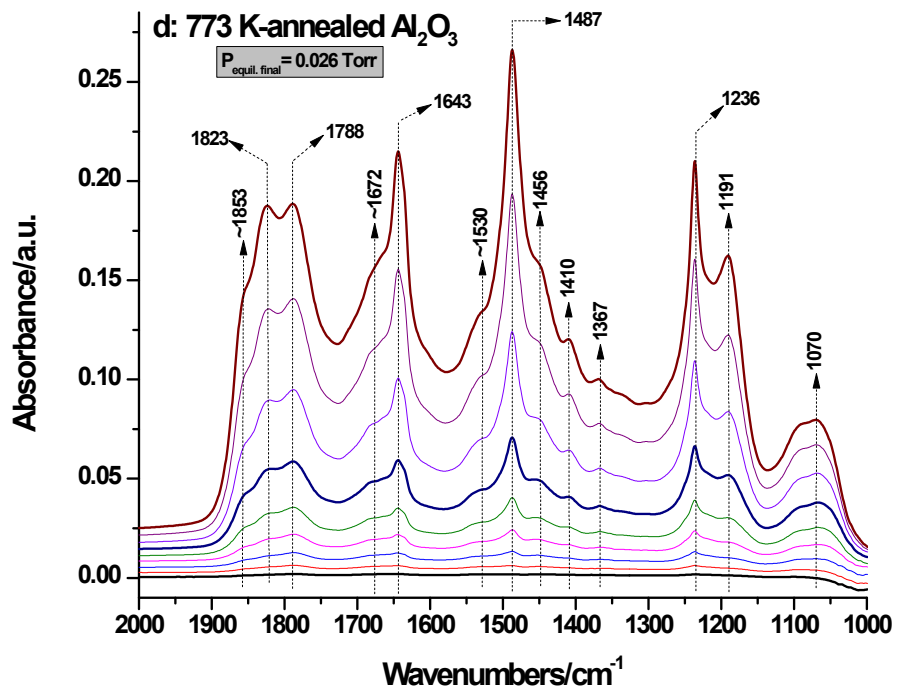

**Figure S2.** IR spectra collected during the stepwise annealing (in vacuum) of the CO<sub>2</sub>-saturated, 773 K-annealed  $\gamma$ -Al<sub>2</sub>O<sub>3</sub> sample. (IR spectra were collected at 295 K. Temperature increment between 300 and 500 K was 25 K, and above that 50 K.)

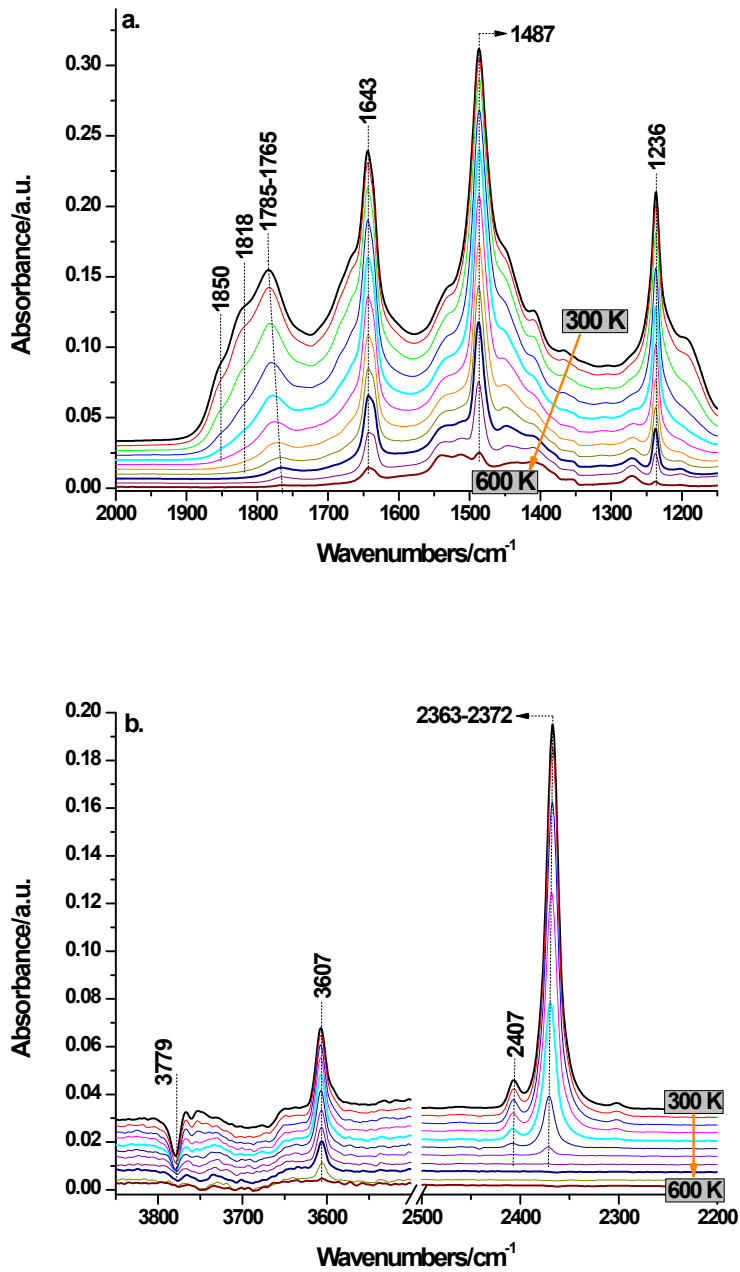

**Figure S3.** Five series of IR spectra collected from  $\gamma$ -Al<sub>2</sub>O<sub>3</sub> annealed at different temperatures (from 473 to 973 K) during stepwise CO exposure at 100 K sample temperature.

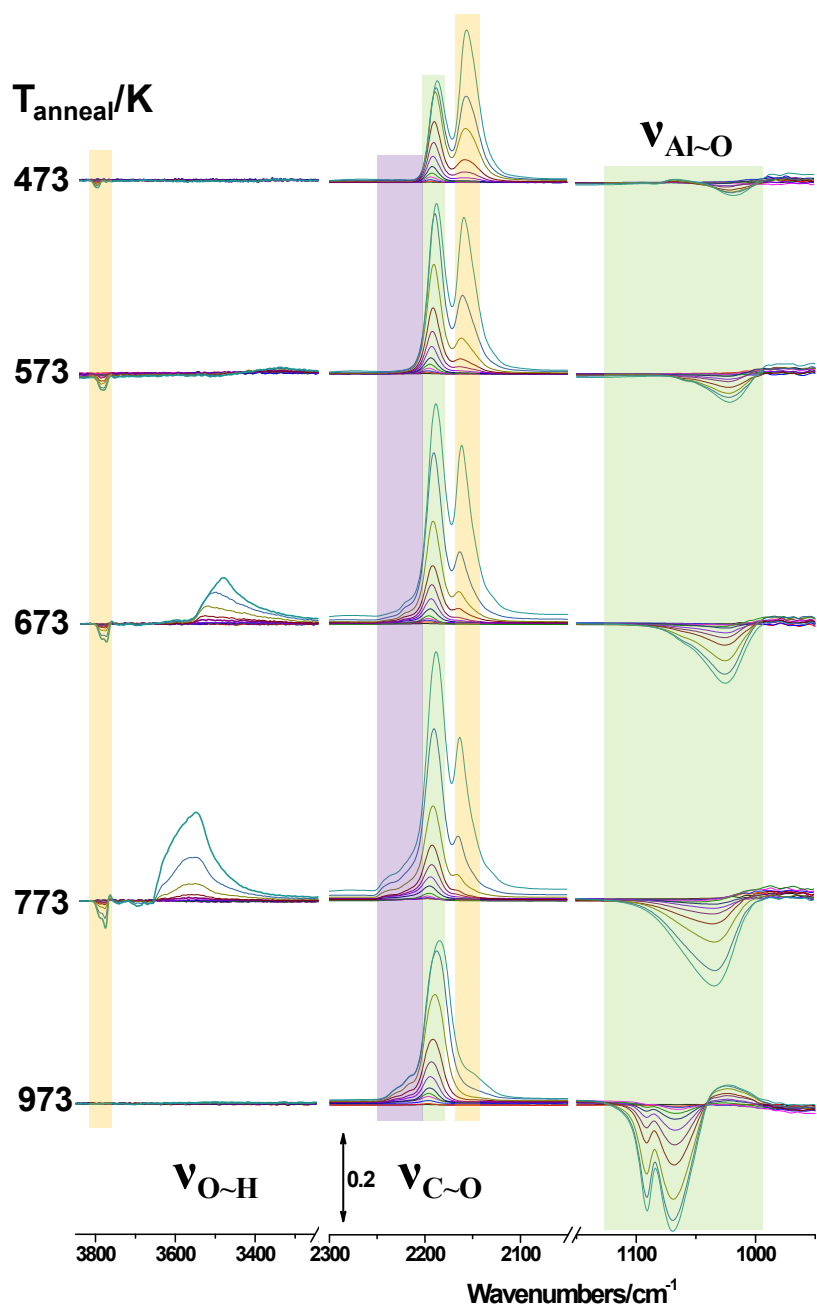

**Figure S4.** Series of IR spectra collected after step-wise H<sub>2</sub>O exposure of a CO<sub>2</sub>-saturated, 773 K-annealed Al<sub>2</sub>O<sub>3</sub> sample at 295 K in the 1150-2000 cm<sup>-1</sup> (a) and 2150-3850 cm<sup>-1</sup> (b) regions.

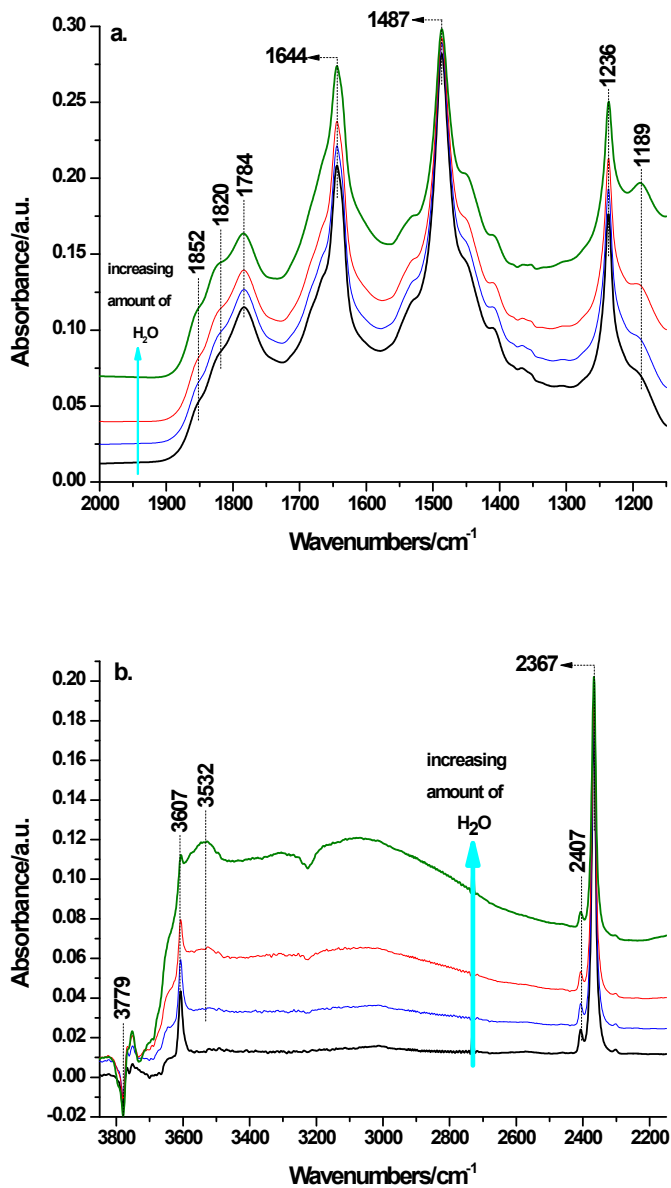

**Figure S5.** Series of IR spectra collected after the exposure of a 773 K-annealed, H<sub>2</sub>O-exposed  $\gamma$ -Al<sub>2</sub>O<sub>3</sub> sample to CO<sub>2</sub> at 295 K. ( $P_{\text{H}_2\text{O}} = 2$  Torr and  $P_{\text{CO}_2} = 5$  Torr in the gas manifold)

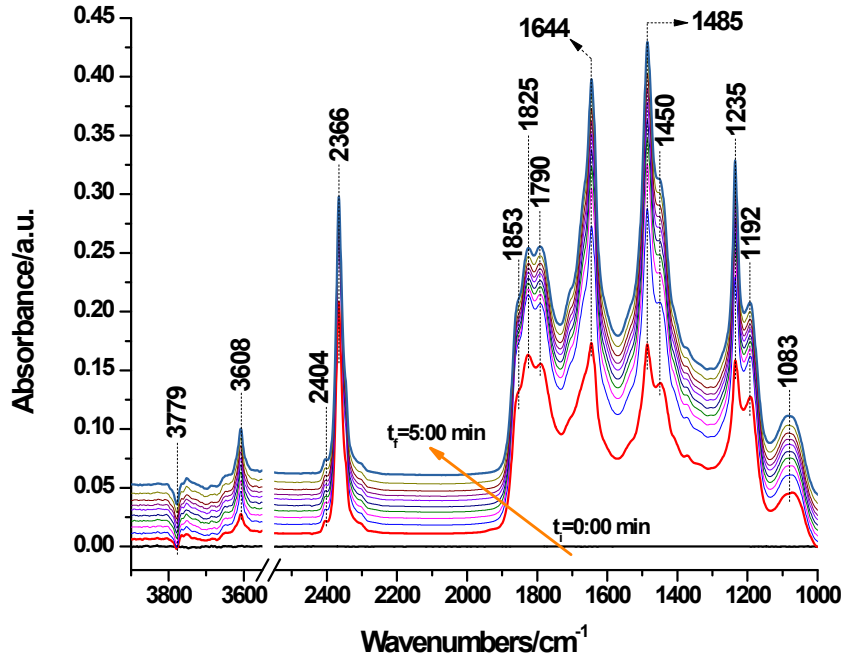

**Table. S1.** Assignment of IR features observed after CO<sub>2</sub> and CO adsorption on  $\gamma$ -Al<sub>2</sub>O<sub>3</sub>**CO<sub>2</sub>/ $\gamma$ -Al<sub>2</sub>O<sub>3</sub>**

| <b>Wavenumbers/cm<sup>-1</sup></b> | <b>Assignment</b>                       | <b>Reference</b> |
|------------------------------------|-----------------------------------------|------------------|
|                                    | <b>chemisorbed CO<sub>2</sub> on</b>    |                  |
| 2360-2366                          | Al <sup>3+</sup> <sub>VI</sub>          | 12;16;17         |
| 2405                               | Al <sup>3+</sup> <sub>IV</sub>          |                  |
|                                    | <b>Bridged and bidentate carbonates</b> | 9;12;15;17       |
| 1067                               | $\gamma$ <sub>COO</sub>                 |                  |
| 1206-1191                          | $\nu$ <sub>as</sub>                     |                  |
| 1720-1870                          | $\nu$ <sub>sym</sub>                    |                  |
|                                    | <b>Bicarbonates</b>                     | 7;8;12;17        |
| 1228-1236                          | $\gamma$ <sub>OH</sub>                  |                  |
| 1438                               | $\nu$ <sub>sym</sub> B1                 |                  |
| 1469-1486                          | $\nu$ <sub>sym</sub> B2                 |                  |
| 1644-1650                          | $\nu$ <sub>as</sub>                     |                  |
| 3621-3607                          | $\nu$ <sub>OH</sub>                     |                  |
|                                    | <b>Free carbonates</b>                  | 5;12;17          |
| 1409                               | $\nu$ <sub>as</sub>                     |                  |

**CO/ $\gamma$ -Al<sub>2</sub>O<sub>3</sub>**

|                      |                                                                |    |
|----------------------|----------------------------------------------------------------|----|
| 2155-2166            | <b>H-bonded CO</b>                                             | 12 |
| 2186-2208            | <b>Lewis site-bound on low index planes</b>                    | 12 |
| 2220-2223, 2230-2245 | <b>Lewis site-bound on defects (step edges, corners, etc.)</b> | 12 |
| 1050-1090            | <b>CO adsorption-relaxed Al-O vibration</b>                    | 12 |
